# Supplementary material for: Shoulder pain in primary care: diagnostic accuracy of clinical examination tests for non-traumatic acromioclavicular joint pain
Source: PubMed Central journal article supplement (PMC3646690; doi:10.1186/1471-2474-14-156), 2013-05-01
Supplement: 1471-2474-14-156-S1.pdf [file 1471-2474-14-156-S1.pdf]

## Additional File 1. Clinical examination variables

| Clinical examination component                                                                                                                                                             | Response outcome                                                                                                                     |
|--------------------------------------------------------------------------------------------------------------------------------------------------------------------------------------------|--------------------------------------------------------------------------------------------------------------------------------------|
| <b>Self Report Questionnaires</b>                                                                                                                                                          |                                                                                                                                      |
| SF-8 Health Survey                                                                                                                                                                         | % (dichotomised by median)                                                                                                           |
| Shoulder Pain and Disability Index (SPADI)                                                                                                                                                 | % (dichotomised by median)                                                                                                           |
| Fear Avoidance Beliefs Questionnaire (FABQ)                                                                                                                                                | % (dichotomised by median)                                                                                                           |
| <b>Patient History</b>                                                                                                                                                                     |                                                                                                                                      |
| <i>Medical screening questionnaire:</i><br>Medical conditions<br>Smoking status                                                                                                            | Dichotomous responses                                                                                                                |
| <i>Symptom chart:</i><br>Pain location<br>Pain intensity<br>Nature of pain<br>Night pain disturbs sleep<br>Able to sleep on affected side<br>Aggravating activities<br>Easing activities   | Categorical (anterior, posterior, superior, lateral, deep)<br>100mm VAS<br>Constant/intermittent<br>Yes/No<br>Yes/No<br>List<br>List |
| <i>History of current episode:</i><br>Date of onset<br>Mechanism of pain onset<br>Previous history of shoulder pain<br>Previous episodes fully resolved<br>Family history of shoulder pain | Date<br>Traumatic, strain, repetitive, insidious<br>Yes/No<br>Yes/No<br>Yes/No                                                       |
| <b>Physical Examination</b>                                                                                                                                                                |                                                                                                                                      |
| Height/weight                                                                                                                                                                              | Standard SI units                                                                                                                    |
| <i>Observation:</i><br>Supraspinatus atrophy<br>Infraspinatus atrophy<br>ACJ swelling/thickening                                                                                           | Present/absent                                                                                                                       |
| <i>Cervical spine testing:</i><br>Reproduction of shoulder symptoms<br>Production of cervical spine symptoms                                                                               | Yes/No                                                                                                                               |
| <i>Shoulder active ROM:</i><br><sup>a</sup> Elevation (flexion)<br>Hand-behind-back<br>Hand-behind-head                                                                                    | ROM (°); symptom responses: Yes/No<br>ROM (cm); symptom responses: Yes/No<br>ROM (cm); symptom responses: Yes/No                     |
| <sup>a</sup> <i>Shoulder passive ROM:</i><br>Glenohumeral abduction<br>External rotation (0° abd)<br>External rotation (90° abd)<br>Internal rotation (90° abd)<br>Cross-body adduction    | ROM (°); symptom responses: Yes/No                                                                                                   |
| <sup>a</sup> <i>Shoulder resisted tests:</i><br>Abduction<br>External rotation<br>Internal rotation                                                                                        | Peak muscle force (kg); symptom responses: Yes/No                                                                                    |
| <i>Scapuloclavicular tests:</i><br>Elevation<br>Depression<br>Protraction<br>Retraction                                                                                                    | Symptom responses: Yes/No                                                                                                            |
| <i>Orthopaedic special tests:</i><br>Painful arc abduction                                                                                                                                 | Positive/Negative according to original test criteria.                                                                               |

|                                                                                                                                                                                     |                                |
|-------------------------------------------------------------------------------------------------------------------------------------------------------------------------------------|--------------------------------|
| Hawkins-Kennedy test<br>Empty can test<br>Drop-arm test<br>External rotation lag sign<br>Belly press test<br>Active compression test<br>Speeds test<br>Apprehension/Relocation test |                                |
| <i>Palpation:</i><br>Acromioclavicular joint<br>Greater tuberosity (supraspinatus insertion)<br>Lesser tuberosity (subscapularis insertion)<br>Long head of biceps tendon           | Typical pain reproduced Yes/No |

*Abbreviations:* VAS, visual analogue scale; ACJ, acromioclavicular joint; ROM, range of motion
